# Supplementary material
Source: PubMed Central journal article supplement (PMC8932936)
Supplement: NIHMS1738360-supplement-Supplemental_Material.pdf [file NIHMS1738360-supplement-Supplemental_Material.pdf]

Supplemental Figure 1. *Edge weight bootstrap Confidence Interval (CI) values*

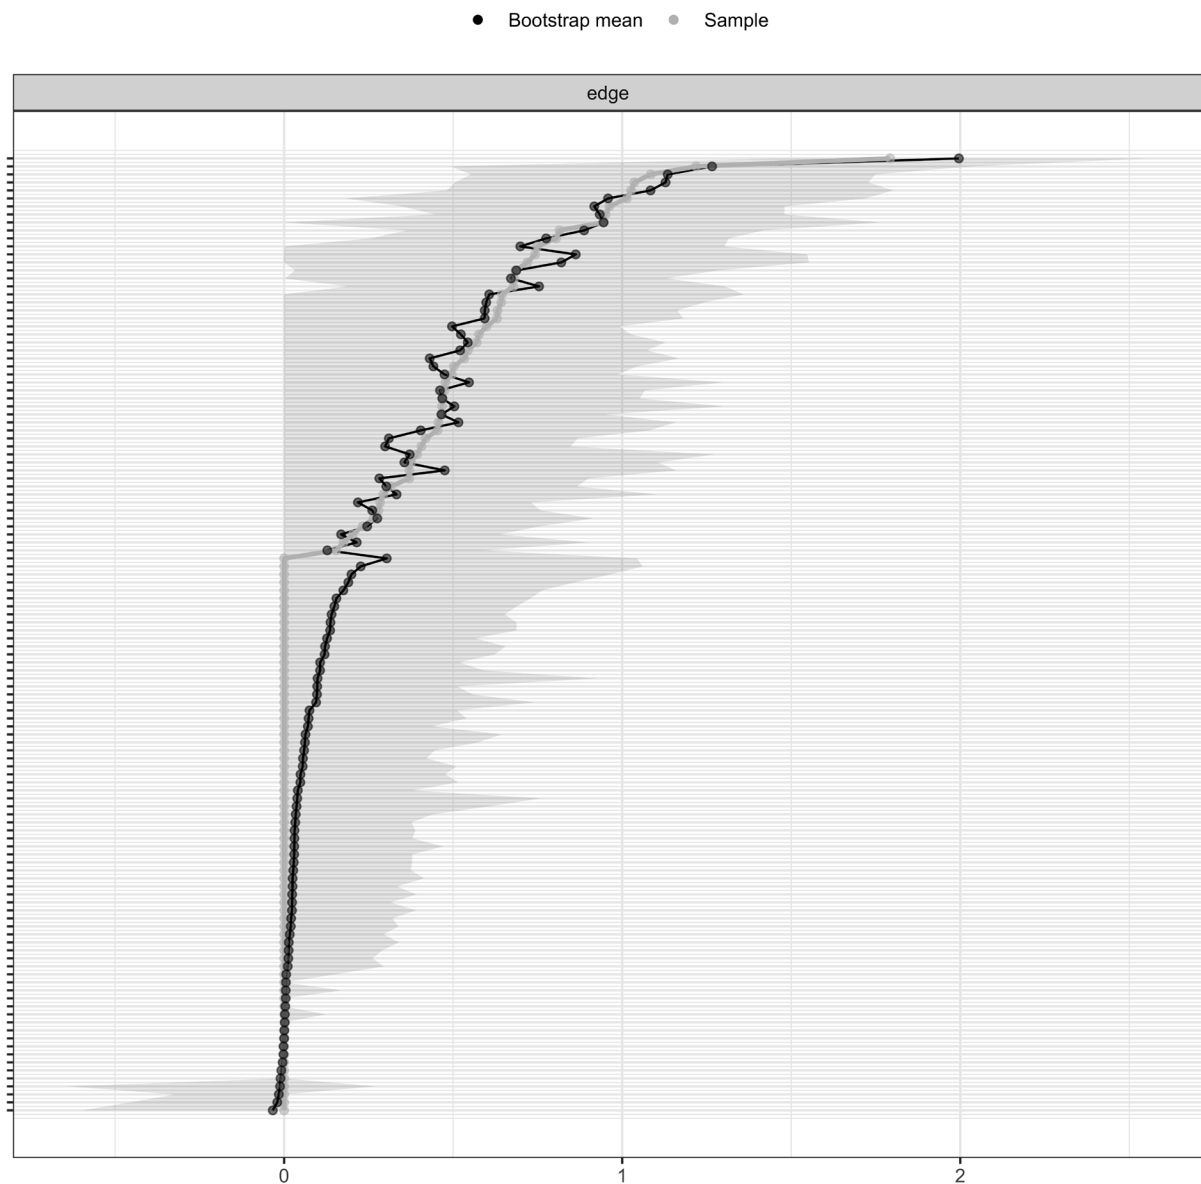

Note. LEC-5 is the Life Events Checklist for DSM-5; LEC-5 1 is natural disaster; LEC-5 2 is fire/explosion; LEC-5 3 is transportation accident; LEC-5 4 is serious accident at work/home/during recreational activity; LEC-5 5 is exposure to toxic substance; LEC-5 6 is physical assault; LEC-5 7 is assault with a weapon; LEC-5 8 is sexual assault; LEC-5 9 is other unwanted/uncomfortable sexual experience; LEC-5 10 is combat or exposure to war; LEC-5 11 is forced captivity; LEC-5 12 is life-threatening illness/injury; LEC-5 13 is severe human suffering; LEC-5 14 is sudden, violent death; LEC-5 15 sudden, accidental death; LEC-5 16 is serious injury/harm/death you caused to someone else; we excluded Y axis labels as it was unreadable because of the several comparisons.

Supplemental Figure 2. Tests of significant differences between edge weights

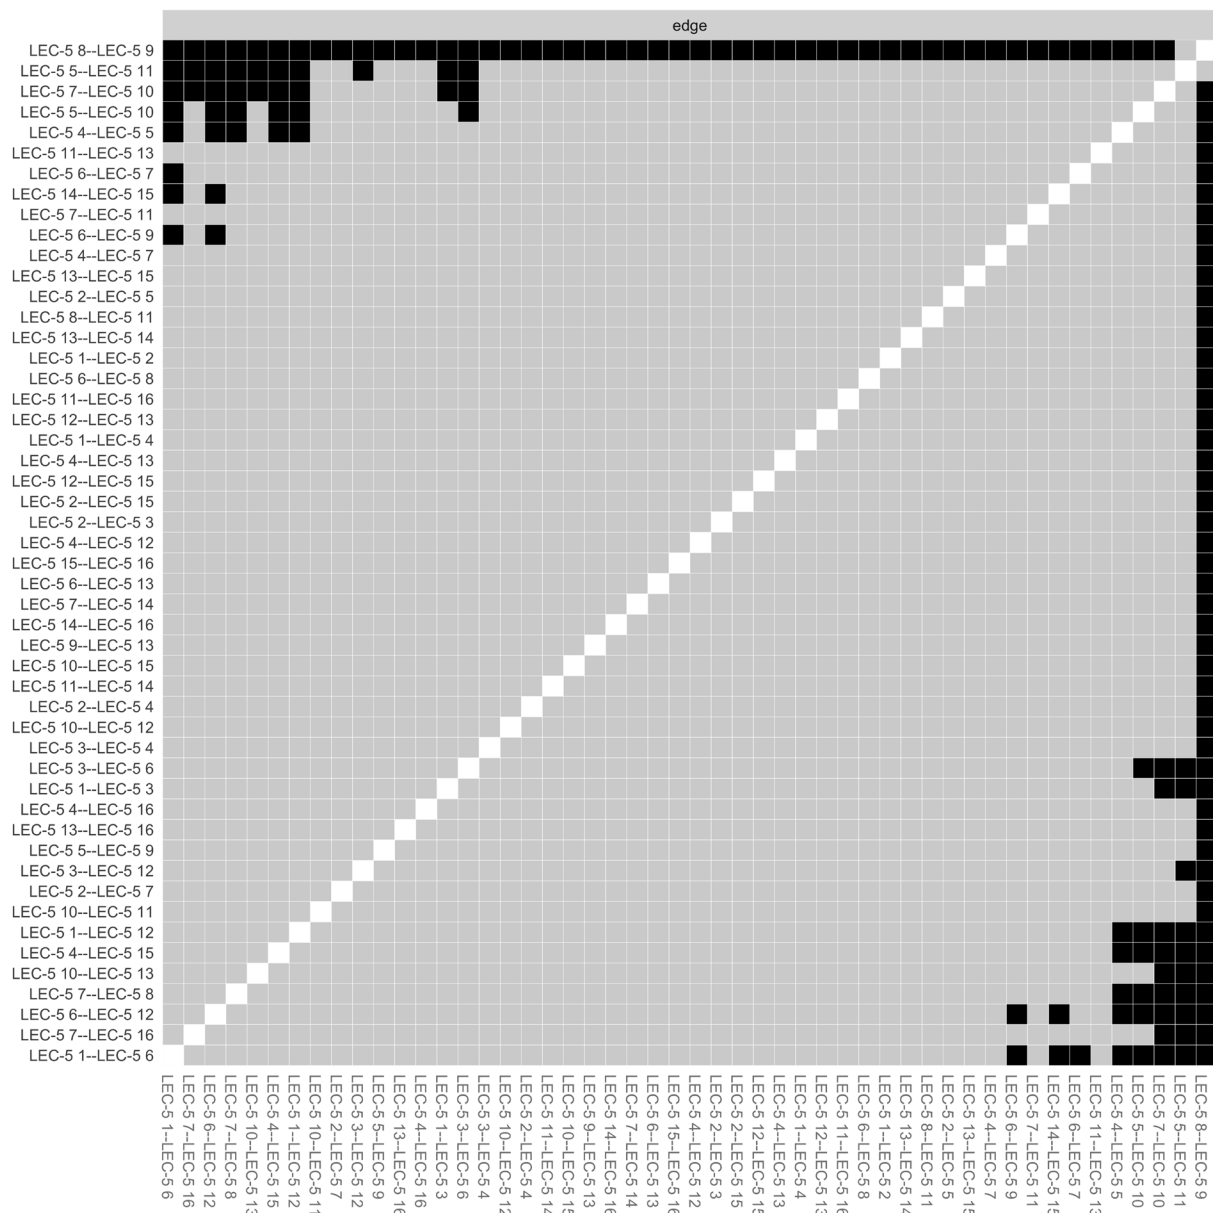

Note. LEC-5 is the Life Events Checklist for DSM-5; LEC-5 1 is natural disaster; LEC-5 2 is fire/explosion; LEC-5 3 is transportation accident; LEC-5 4 is serious accident at work/home/during recreational activity; LEC-5 5 is exposure to toxic substance; LEC-5 6 is physical assault; LEC-5 7 is assault with a weapon; LEC-5 8 is sexual assault; LEC-5 9 is other unwanted/uncomfortable sexual experience; LEC-5 10 is combat or exposure to war; LEC-5 11 is forced captivity; LEC-5 12 is life-threatening illness/injury; LEC-5 13 is severe human suffering; LEC-5 14 is sudden, violent death; LEC-5 15 sudden, accidental death; LEC-5 16 is serious injury/harm/death you caused to someone else.

*Supplemental Figure 3. Predictability values of nodes in the network.*

### Trauma Types

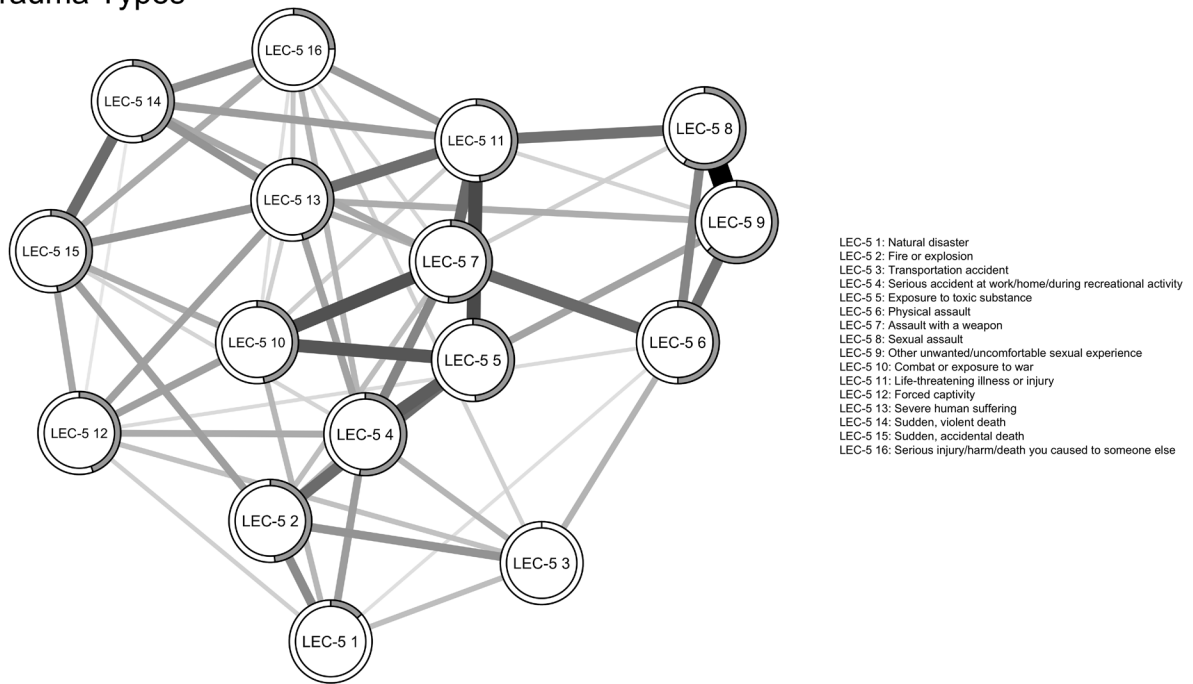

*Note.* Solid lines indicate positive associations; dashed lines indicate negative associations; the grey part of the ring around each node represents its predictability
